# Supplementary material for: Increased survival rate by the pediatric acute lymphoblastic leukemia therapy intensification based on minimal residual disease levels along with protocol-based risk classification by early response.
Source: Research Square preprint supplement (doi:10.21203/rs.3.rs-5805700/v1), 2025-01-15

**Supplementary Information**

**Increased survival rate by the pediatric acute lymphoblastic leukemia therapy intensification based on minimal residual disease levels along with protocol-based risk classification by early response**

Hyery Kim1, Su Hyun Yoon1, Sunghan Kang1, Kyung-Nam Koh1, Ho Joon Im1, Chan-Jeoung Park2, Mi Young Kim2, Young-Uk Cho2, Sang-Hyun Hwang2, Seongsoo Jang2, Jong Jin Seo1, 3

1Department of Pediatrics, University of Ulsan College of Medicine, Asan Medical Center, Seoul, South Korea

2Department of Laboratory Medicine, University of Ulsan College of Medicine, Asan Medical Center, Seoul, South Korea

3Korean Association for Children with Leukemia and Cancer

Corresponding Author: Hyery Kim, M.D., Ph. D

Email: taban@hanmail.net

**Supplementary Table** **1**.

| **Modified AALL0331** | | |
| --- | --- | --- |
| Phase | Treatment |  |
| Induction | Dexamethasone | 6 mg/㎡ #2 PO x 28 days, D1-28 |
|  | Vincristine | 1.5 mg/㎡ (Max. 2 mg) IV push, D1, 8, 15, 22 |
|  | L-asparaginase | 6,000 IU/㎡ IM x 9 doses beginning D4 or 5 or 6 |
|  |  | (PEG-asparaginase 2,500 IU/㎡ IM x 1 dose, D4 or 5 or 6) |
|  | IT Ara-C | 30 mg (1-1.99 yrs), 50 mg (2-2.99 yrs), 70 mg (≥ 3 yrs), D1 |
|  | IT MTX | 8 mg (1-1.99 yrs), 10 mg (2-2.99 yrs), 12 mg (3-8.99 yrs), 15 mg (≥ 9 yrs) |
|  |  | CNS 1 & 2 - D8, 29 / CNS 3 - D8, *15, *22, 29 |
| **Protocol based risk stratification** | **RER** | **M1 at day 8 or day 15** |
| **SER** | **㎡ or M3 at day 15** |
| Consolidation | 6-MP | 50 mg/㎡/day PO, D1-14 & D29-42 (OT/PT<5 x UNL) |
|  | Cyclophophmide | 1,000 mg/㎡ in D5W 100 ml/㎡ IV over 1 hr, D1 & 29 with mesna |
|  | Ara-C | 75 mg/㎡ IV push or SC, D1-4, 8-11, 29-32, 36-39 |
|  | Vincristine | 1.5 mg/㎡ (Max. 2 mg) IV push, D15, 22, 43, 50 |
|  | L-asparaginase | 6,000 IU/㎡ IM, total 6 doses beginning D15 + total 6 doses beginning D43 |
|  |  | (PEG-asparaginase 2,500 IU/㎡ IM x 1 dose, D4 or 5 or 6) |
|  | IT MTX | 8 mg (1-1.99 yrs), 10 mg (2-2.99 yrs), 12 mg (3-8.99 yrs), 15 mg (≥ 9 yrs) |
|  |  | CNS 1 & 2 - D1, 8, *15, *22 / CNS 3 - D1, 8 |
| Interim maintenance (Standard) | Dexamethasone | 6 mg/㎡ #2 PO, D1-5, 29-33 |
|  | Vincristine | 1.5 mg/㎡ (Max. 2 mg) IV push, D1 & 29 |
|  | MTX | 20 mg/㎡/dose PO, D1, 8, 15, 22, 29, 36, 43, 50 (OT/PT<5 x UNL) |
|  | 6-MP | 50 mg/㎡/day PO, D1-50 (OT/PT<5 x UNL) |
|  | IT MTX | 8 mg (1-1.99 yrs), 10 mg (2-2.99 yrs), 12 mg (3-8.99 yrs), 15 mg (≥ 9 yrs), D29 |
| Interim maintenance (Augmented)-1 | Vincristine | 1.5 mg/㎡ (Max. 2 mg) IV push, D1, 11, 21, 31, 41 |
|  | MTX | 100 mg/㎡/dose escalate by 50 mg/㎡/dose IV push, D1, 11, 21, 31, 41 |
|  |  | Discontinue excalation and resume at 80% of last dose if delay it necessary for myelosuppression or Gr3 mucositis |
|  | L-asparaginase | 6,000 IU/㎡ IM, 6 doses beginning D2 + 6 doses beginning D22 |
|  |  | (PEG-asparaginase 2,500 IU/㎡ IM D2 & 22) |
|  | IT MTX | 8 mg (1-1.99 yrs), 10 mg (2-2.99 yrs), 12 mg (3-8.99 yrs), 15 mg (≥ 9 yrs), D1, 31 |
| Delayed intensification (Standard) | Dexamethasone | 10 mg/㎡ #2 PO, D1-21 (Do not taper) |
|  | Vincristine | 1.5 mg/㎡ (Max. 2 mg) IV push, D1, 8, 15 |
|  | Doxorubicin | 25 mg/㎡ IV over 5 mins, D1, 8, 15 |
|  | L-asparaginase | 6,000 IU/㎡ IM x 6 doses, beginning D4 or 5 or 6 |
|  |  | (PEG-asparaginase 2,500 IU/㎡ IM D4 or 5 or 6) |
|  | Cyclophophmide | 1,000 mg/㎡ in D5W 100 ml/㎡ IV over 1 hr, D29 |
|  | Mesna | 200 mg/㎡ in D5W (≥ 10kg 50 ml, < 10kg 30 ml) IV over 15 mins, pre -15 mins & post HR3, 6, 9 |
|  | 6-MP | 50 mg/㎡/day PO, D29-42 (OT/PT<5 x UNL) |
|  | Ara-C | 75 mg/㎡ IV push or SC, D29-32 & 36-39 |
|  | IT MTX | 8 mg (1-1.99 yrs), 10 mg (2-2.99 yrs), 12 mg (3-8.99 yrs), 15 mg (≥ 9 yrs), D1, 29 |
| Delayed intensification (Augmented)-1 | Dexamethasone | 10 mg/㎡ #2 PO, D1-21 (Do not taper) |
|  | Vincristine | 1.5 mg/㎡ (Max. 2 mg) IV push, D1, 8, 15, 43, 50 |
|  | Doxorubicin | 25 mg/㎡ IV over 5 mins, D1, 8, 15 |
|  | L-asparaginase | 6,000 IU/㎡ IM, 6 doses beginning D4 or 5 or 6 + 6 doses beginning D43 |
|  |  | (PEG-asparaginase 2,500 IU/㎡ IM D4 or 5 or 6 and D43) |
|  | Cyclophophmide | 1,000 mg/㎡ in D5W 100 ml/㎡ IV over 1 hr, D29 |
|  | Mesna | 200 mg/㎡ in D5W (≥ 10kg 50 ml, < 10kg 30 ml) IV over 15 mins, pre -15 mins & post HR3, 6, 9 |
|  | 6-MP | 50 mg/㎡/day PO, D29-42 (OT/PT<5 x UNL) |
|  | Ara-C | 75 mg/㎡ IV push or SC, D29-32 & 36-39 |
|  | IT MTX | 8 mg (1-1.99 yrs), 10 mg (2-2.99 yrs), 12 mg (3-8.99 yrs), 15 mg (≥ 9 yrs), D1, 29, 36 |
| Interim maintenance (Augmented)-2 | Vincristine | 1.5 mg/㎡ (Max. 2 mg) IV push, D1, 11, 21, 31, 41 |
|  | MTX | 50 mg/㎡/dose less than Max. dose from previous escalated dose in IM-1. |
|  |  | escalate by 50 mg/㎡/dose IV push, D1, 11, 21, 31, 41 |
|  |  | Discontinue excalation and resume at 80% of last dose if delay it necessary for myelosuppression or Gr3 mucositis |
|  | L-asparaginase | 6,000 IU/㎡ IM, 6 doses beginning D2 + 6 doses beginning D22 |
|  |  | (PEG-asparaginase 2,500 IU/㎡ IM D2 & 22) |
|  | IT MTX | 8 mg (1-1.99 yrs), 10 mg (2-2.99 yrs), 12 mg (3-8.99 yrs), 15 mg (≥ 9 yrs), D1, 31 |
| Delayed intensification (Augmented)-2 | Dexamethasone | 10 mg/㎡ #2 PO, D1-21 (Do not taper) |
|  | Vincristine | 1.5 mg/㎡ (Max. 2 mg) IV push, D1, 8, 15, 43, 50 |
|  | Doxorubicin | 25 mg/㎡ IV over 5 mins, D1, 8, 15 |
|  | L-asparaginase | 6,000 IU/㎡ IM, 6 doses beginning D4 or 5 or 6 + 6 doses beginning D43 |
|  |  | (PEG-asparaginase 2,500 IU/㎡ IM D4 or 5 or 6 and D43) |
|  | Cyclophophmide | 1,000 mg/㎡ in D5W 100 ml/㎡ IV over 1 hr, D29 |
|  | Mesna | 200 mg/㎡ in D5W (≥ 10kg 50 ml, < 10kg 30 ml) IV over 15 mins, pre -15 mins & post HR3, 6, 9 |
|  | 6-MP | 50 mg/㎡/day PO, D29-42 (OT/PT<5 x UNL) (Do not give to pts receiving Cranial RT) |
|  | Ara-C | 75 mg/㎡ IV push or SC, D29-32 & 36-39 |
|  | IT MTX | 8 mg (1-1.99 yrs), 10 mg (2-2.99 yrs), 12 mg (3-8.99 yrs), 15 mg (≥ 9 yrs), D1, 29, *36 (Do not give to pts receiving Cranial RT) |
|  |  | * Omit D36 IT MTX and the 2 weeks of 6-MP (D29-42) for pts receiving cranial RT |
| Maintenance | Vincristine | 1.5 mg/㎡ (Max. 2 mg) IV push every 4 weeks, D1, 29, 57 |
|  | Dexamethasone | 6 mg/㎡ #2 PO 5 days every 4 weeks, D1-5, 29-33, 57-61 (Do not taper) |
|  | 6-MP | 50 mg/㎡/day PO, D1-84 (OT/PT<5 x UNL). Dose escalation during Maintenance. |
|  | MTX | 20 mg/㎡/dose PO weekly, D8, 15, 22, 29, 36, 43, 50, 57, 64, 71, 78 (OT/PT<5 x UNL). Dose escalation during Main. |
|  | IT MTX | 8 mg (1-1.99 yrs), 10 mg (2-2.99 yrs), 12 mg (3-8.99 yrs), 15 mg (≥ 9 yrs), D1 |
| **Korean multicenter study 0601 regimen** | | |
| Phase | Treatment |  |
| Induction | PD | 60 mg/㎡ #3 PO, D0-27, then taper over 2 wks |
|  | Vincristine | 1.5 mg/㎡ (Max. 2 mg) IV push, D0, 7, 14, 21 |
|  | Daunomycin | 25 mg/㎡ IV over 5 mins, D0, 7, *14, *21 |
|  |  | (*Day 14 & 21 ANC ≥500/μL, PLT ≥50K/μL / If Day 14 bone marrow shows M3, administer regardless of ANC) |
|  | L-asparaginase | 6,000 IU/㎡ IM x 3/wk, beginning D3, total 9 doses |
|  | IT Ara-C | 1-2 Yr 30 mg, 2-3 Yr 50 mg, ≥ 3 Yr 70 mg, D0 |
|  | IT MTX | 8 mg(1-1.99 yrs), 10 mg(2-2.99 yrs), 12 mg(3-8.99 yrs), 15 mg(≥ 9 yrs) |
| **Protocol based risk stratification** | **RER** | **M1 or ㎡ at day 8** |
| **SER** | **M3 at day 8, or extramedullary involvement, MLL rearrangement** |
| Consolidation | Cyclophosphamide | 1,000 mg/㎡ in D5W (≥ 10kg 100 ml, < 10kg 50 ml) IV over 30 mins, D0 & 28 with mesna |
|  | 6-MP | 50 mg/㎡/day PO, D0-13, D28-41 |
|  | Ara-C | 75 mg/㎡ IV or SC x 16 doses, D0-3, 7-10, 28-31, 35-38 |
|  | Vincristine | 1.5 mg/㎡ (Max. 2 mg) IV push, D14, 21, 42, 49 |
|  | L-asparaginase | 6,000 IU/㎡ IM, D14, 16, 18, 21, 23, 25, 42, 44, 46, 49, 51, 53 |
|  | IT MTX | 8 mg(1-1.99 yrs), 10 mg(2-2.99 yrs), 12 mg(3-8.99 yrs), 15 mg(≥ 9 yrs), D0, 7, 14, 21 |
| Interim maintenance (RER) | Vincristine | 1.5 mg/㎡ (Max. 2 mg) IV push, D0, 10, 20, 30, 40 |
|  | MTX | 100 mg/㎡(initial dose) IV push, D0, 10, 20, 30, 40 escalate by 50 mg/㎡/dose to toxicity |
|  | L-asparaginase | 15,000 IU/㎡ IM, D1, 11, 21, 31, 41 |
|  | IT MTX | 8 mg(1-1.99 yrs), 10 mg(2-2.99 yrs), 12 mg(3-8.99 yrs), 15 mg(≥ 9 yrs), D0 & 20 |
| Delayed intensification (RER) | Vincristine | 1.5 mg/㎡ (Max. 2 mg) IV push, D0, 7, 14, 42, 49 |
|  | Adriamycin | 25 mg/㎡ IV over 5 mins, D0, 7, 14 (ANC≥500/ul, PLT≥50K/ul) |
|  | L-asparaginase | 6000 IU/㎡ x 12 doses IM, (D3-14 ; 6 doses) & (D42-53 ; 6 doses) |
|  | Dexamethasone | 10 mg/㎡/day #3 PO, D0-6 & D14-20 (no taper) |
|  | Cyclophophamide | 1,000 mg/㎡ in D5W 100 ml/㎡ IV over 1 hr, D28 with mesna |
|  | 6-MP | 50 mg/㎡/day PO, D28-41 (T-bil>2 mg/dl hold) |
|  | Ara-C | 75 mg/㎡/day IV or SC, D28-31, 35-38 |
|  | IT MTX | 8 mg(1-1.99 yrs), 10 mg(2-2.99 yrs), 12 mg(3-8.99 yrs), 15 mg(≥ 9 yrs), D0, 28, 35 |
| Interim maintenance (SER) #1 | Vincristine | 1.5 mg/㎡ (Max. 2 mg) IV push, D0, 10, 20, 30, 40 |
|  | MTX | 100 mg/㎡(initial dose) IV push, D0, 10, 20, 30, 40 escalate by 50 mg/㎡/dose to toxicity |
|  | L-asparaginase | 15,000 IU/㎡ IM, D1, 11, 21, 31, 41 |
|  | IT MTX | 8 mg(1-1.99 yrs), 10 mg(2-2.99 yrs), 12 mg(3-8.99 yrs), 15 mg(≥ 9 yrs), D0 & 20 |
| Delayed intensification (SER) #1 | Vincristine | 1.5 mg/㎡ (Max. 2 mg) IV push, D0, 7, 14, 42, 49 |
|  | Adriamycin | 25 mg/㎡ IV over 5 mins, D0, 7, 14 (ANC≥500/ul, PLT≥50K/ul) |
|  | L-asparaginase | 6,000 IU/㎡ x 12 doses IM, (D3-14 ; 6 doses) & (D42-53 ; 6 doses) |
|  | Dexamethasone | 10 mg/㎡/day #3 PO, D0-6 & D14-20 (no taper) |
|  | Cyclophophamide | 1,000 mg/㎡ in D5W 100 ml/㎡ IV over 1 hr, D28 with mesna |
|  | 6-MP | 50 mg/㎡/day PO, D28-41 (T-bil>2 mg/dl hold) |
|  | Ara-C | 75 mg/㎡/day IV or SC, D28-31, 35-38 |
|  | IT MTX | 8 mg(1-1.99 yrs), 10 mg(2-2.99 yrs), 12 mg(3-8.99 yrs), 15 mg(≥ 9 yrs), D0, 28, 35 |
| Interim maintenance (SER) #2 | Same as IM #1 |  |
| Delayed intensification (SER) #2 | Vincristine | 1.5 mg/㎡ (Max. 2 mg) IV push, D0, 7, 14, 42, 49 |
|  | Daunorubicin | 25 mg/㎡ IV over 5 mins, D0, 7, 14 (ANC≥500/ul, PLT≥50K/ul) |
|  | L-asparaginase | 6,000 IU/㎡ x 12 doses IM, (D3-14 ; 6 doses) & (D42-53 ; 6 doses) |
|  | Dexamethasone | 10 mg/㎡/day #3 PO, D0-6 & D14-20 (no taper) |
|  | Cyclophophamide | 1,000 mg/㎡ in D5W 100 ml/㎡ IV over 1 hr, D28 with mesna |
|  | 6-MP | 50 mg/㎡/day PO, D28-41 (*Omit when Cranial RT) (T-bil>2 mg/dl hold) |
|  | Ara-C | 75 mg/㎡/day IV or SC, D28-31, 35-38 |
|  | IT MTX | 8 mg(1-1.99 yrs), 10 mg(2-2.99 yrs), 12 mg(3-8.99 yrs), 15 mg(≥ 9 yrs), D0, 28, **35 (Skip Day 35 if Cranial RT is given) |
|  | RT | Cranial or CSRT should begin by D29 of DI #2 therapy when ANC≥750/ul, PLT≥75K/ul |
|  |  | (all SER - Cranial RT(12Gy) / CNS3 - CSRT(cranial 18Gy, spinal 6Gy) /Exception : RER testicular ALL cases) |
| Maintenance | Vincristine | 1.5 mg/㎡ (Max. 2 mg) IV push every 4 weeks, D0, 28, 56 |
|  | PD | 40 mg/㎡ #3 PO 5 days every 4 weeks, D0-4, 28-32, 56-60 (Do not taper) |
|  | 6-MP | 50 mg/㎡/day PO, D0-83 (Dose adjust ANC 750-1500/ul, PLT>75K/ul) |
|  | MTX | 20 mg/㎡/dose PO weekly, D7, 14, 21, (**28), 35, 42, 49, 56, 63, 70, 77 (**Omit when IT MTX is given) |
|  | IT MTX | 8 mg(1-1.99 yrs), 10 mg(2-2.99 yrs), 12 mg(3-8.99 yrs), 15 mg(≥ 9 yrs), D0 & *28 (Day 28 is administered up to 4 cycles only) |
| **Korean multicenter study 1501 regimen** | | |
| Phase | Treatment |  |
| Induction | PD | 60 mg/㎡ #3 PO, D0-27, then taper over 2 wks |
|  | Vincristine | 1.5 mg/㎡ (Max. 2 mg) IV push, D0, 7, 14, 21 |
|  | Daunomycin | 25 mg/㎡ IV over 5 mins, D0, 7, 14, 21 |
|  |  | (*Day 14 & 21 ANC ≥500/μL, PLT ≥50K/μL / If Day 14 bone marrow shows M3, administer regardless of ANC) |
|  | L-asparaginase | 6,000 IU/㎡ IM x 3/wk, beginning D3, total 9 doses |
|  | IT Ara-C | 1-2 Yr 30 mg, 2-3 Yr 50 mg, ≥ 3 Yr 70 mg, D0 |
|  | IT MTX | 8 mg(1-1.99 yrs), 10 mg(2-2.99 yrs), 12 mg(3-8.99 yrs), 15 mg(≥ 9 yrs) |
| **Protocol based risk stratification** | **RER** | **M1 or ㎡ at day 8 & M1 at day 15** |
| **SER** | **other than RER, extramedullary involvement, WBC≥100,000/uL** |
| Consolidation | Cyclophosphamide | 1,000 mg/㎡ in D5W (≥ 10kg 100 ml, < 10kg 50 ml) IV over 30 mins, D0 & 28 with mesna |
|  | 6-MP | 50 mg/㎡/day PO, D0-13, D28-41 |
|  | Ara-C | 75 mg/㎡ IV or SC x 16 doses, D0-3, 7-10, 28-31, 35-38 |
|  | Vincristine | 1.5 mg/㎡ (Max. 2 mg) IV push, D14, 21, 42, 49 |
|  | L-asparaginase | 6,000 IU/㎡ IM, D14, 16, 18, 21, 23, 25, 42, 44, 46, 49, 51, 53 |
|  | IT-Triple | Age-adjusted, D0, 7, 14, 21 |
| Interim maintenance (RER) #1 | Vincristine | 1.5 mg/㎡ (Max. 2 mg) IV push, D0, 10, 20, 30, 40 |
|  | MTX | 100 mg/㎡(initial dose) IV push, D0, 10, 20, 30, 40 escalate by 50 mg/㎡/dose to toxicity |
|  | L-asparaginase | 15,000 IU/㎡ IM, D1, 11, 21, 31, 41 |
|  | IT-Triple | Age-adjusted, D0, 20 |
| Interim maintenance (SER) #1 | Vincristine | 1.5 mg/㎡ (Max. 2 mg) IV push, D0, 28 |
|  | MTX | 5,000 mg/㎡, D0, 7, 14, 28, 42, with leucovorin |
|  | 6-MP | 50 mg/㎡/day PO, D0-56, daily |
|  | IT-Triple | Age-adjusted, D0, 28 |
| Delayed intensification #1 | Vincristine | 1.5 mg/㎡ (Max. 2 mg) IV push, D0, 7, 14, 42, 49 |
|  | Adriamycin | 25 mg/㎡ IV over 5 mins, D0, 7, 14 (ANC≥500/ul, PLT≥50K/ul) |
|  | L-asparaginase | 6,000 IU/㎡ x 12 doses IM, (D3-14 ; 6 doses) & (D42-53 ; 6 doses) |
|  | Dexamethasone | 10 mg/㎡/day #3 PO, D0-6 & D14-20 (no taper) |
|  | Cyclophophamide | 1,000 mg/㎡ in D5W 100 ml/㎡ IV over 1 hr, D28 with mesna |
|  | 6-MP | 50 mg/㎡/day PO, D28-41 (T-bil>2 mg/dl hold) |
|  | Ara-C | 75 mg/㎡/day IV or SC, D28-31, 35-38 |
|  | IT-Triple | Age-adjusted, D0, 28, 35 |
| Interim maintenance (RER) #1 | Same as IM-RER #2 |  |
| Interim maintenance (SER) #1 | Same as IM-SER #2 |  |
| Delayed intensification #2 | Vincristine | 1.5 mg/㎡ (Max. 2 mg) IV push, D0, 7, 14, 42, 49 |
|  | Daunomycin | 25 mg/㎡IV over 5 mins, D0, 7, 14 (ANC ≥500/ul, PLT ≥50K/ul) |
|  | L-asparaginase | 6,000 IU/㎡ x 12 doses IM, (D3-14 ; 6 doses) & (D42-53 ; 6 doses) |
|  | Dexamethasone | 10 mg/㎡/day #3 PO, D0-6 & D14-20 (no taper) |
|  | Cyclophophamide | 1,000 mg/㎡ in D5W 100 ml/㎡ IV over 1 hr, D28 with mesna |
|  | 6-MP | 50 mg/㎡/day PO, D28-41 (T-bil>2 mg/dl hold) |
|  | Ara-C | 75 mg/㎡/day IV or SC, D28-31, 35-38 |
|  | IT-Triple | Age-adjusted, D0, 7, 14, 21 |
| Maintenance (RER) | Vincristine | 1.5 mg/㎡ (Max. 2 mg) IV push every 4 weeks, D0, 28, 56 |
|  | PD | 40 mg/㎡ #3 PO 5 days every 4 weeks, D0-4, 28-32, 56-60 (Do not taper) |
|  | 6-MP | 50 mg/㎡/day PO, D0-83 (Dose adjust ANC 750-1500/ul, PLT>75K/ul) |
|  | MTX | 20 mg/㎡/dose PO weekly, D7, 14, 21, (**28), 35, 42, 49, 56, 63, 70, 77 (**Omit when IT MTX is given) |
|  | IT-Triple | Age-adjusted, D0, 28 (up to cycle 4) |
| Maintenance (SER) | Vincristine | 1.5 mg/㎡ (Max. 2 mg) IV push every 4 weeks, D0, 28, 56 |
|  | PD | 40 mg/㎡ #3 PO 5 days every 4 weeks, D0-4, 28-32, 56-60 (Do not taper) |
|  | 6-MP | 50 mg/㎡/day PO, D0-83 (Dose adjust ANC 750-1500/ul, PLT>75K/ul) |
|  | MTX | 20 mg/㎡/dose PO weekly, D7, 14, 21, (**28), 35, 42, 49, 56, 63, 70, 77 (**Omit when IT MTX is given) |
|  | IT-Triple | Age-adjusted, D0 |


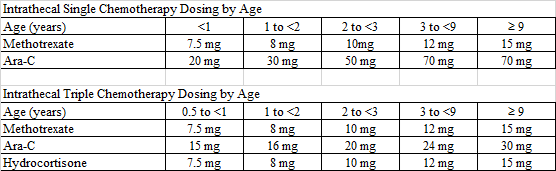


Abbreviations: ALL, acute lymphoblastic leukemia; PO, per os; IV, intravenous; IM, intramuscular; SC, subcutaneous; IT, intrathecal; ITT, intrathecal triple; MTX, methotrexate; Ara-C, cytarabine; 6-MP, 6-mercaptopurine; PD, prednisolone; CNS, central nervous system; RT, radiotherapy; CSRT, craniospinal radiotherapy; RER, rapid early responder; SER, slow early responder; ANC, absolute neutrophil count; PLT, platelets; WBC, white blood cell; PEG, polyethylene glycol; D5W, 5% dextrose in water; OT, SGOT (serum glutamic oxaloacetic transaminase); PT, SGPT (serum glutamic pyruvic transaminase); UNL, upper normal limit; HR, hour; T-bil, total bilirubin

**Supplementary Table** **2.**

| **High MRD during the overall period** | | | | | | | | | | |
| --- | --- | --- | --- | --- | --- | --- | --- | --- | --- | --- |
|  | No. of Total | | ~2015 (N = 55) | | 2016–2019  (N = 77) | | 2020–2023  (N = 72) | | Subtotal | (%) |
| SR | 101 | | 15 | | 22 | | 15 | | 52 | 51.5 |
| HR | 103 | | 14 | | 21 | | 14 | | 49 | 47.6 |
| Total | 204 | | 29 (52.7%) | | 43 (55.8%) | | 29 (40.3%) | | **101** | **49.5** |
| **EOI High MRD** | | | | | | | | | | |
|  | No. of Total | | ~2015 (N = 55) | | 2016–2019  (N = 77) | | 2020–2023  (N = 72) | | Subtotal | (%) |
| SR | 101 | | 2 | | 2 | | 5 | | 9 | 8.9 |
| HR | 103 | | 5 | | 2 | | 5 | | 12 | 11.7 |
| Total | 204 | | 7 (12.7%) | | 4 (5.2%) | | 10 (13.9%) | | **21** | **10.3** |
| **EOC High MRD** | | | | | | | | | | |
|  | No. of Total | | ~2015 (N = 55) | | 2016–2019  (N = 77) | | 2020–2023  (N = 72) | | Subtotal | (%) |
| SR | 101 | | 15 | | 15 | | 5 | | 35 | 34.7 |
| HR | 103 | | 12 | | 14 | | 6 | | 32 | 31.1 |
| Total | 204 | | 27 (49.1%) | | 29 (37.7%) | | 11 (15.3%) | | **67** | **32.8** |
| **High MRD after consolidation blocks** | | | | | | | | | | |
|  | No. of Total | ~2015 (N = 55) | | 2016–2019  (N = 77) | | 2020–2023  (N = 72) | | Subtotal | | (%) |
| SR | 101 | 14 | | 22 | | 10 | | 46 | | 45.5 |
| HR | 103 | 14 | | 19 | | 13 | | 46 | | 44.7 |
| Total | 204 | 28 (50.9%) | | 41 (53.2%) | | 23 (31.9%) | | **92** | | **45.1** |
| **High MRD only after consolidation blocks** | | | | | | | | | | |
|  | No. of Total | ~2015 (N = 55) | | 2016–2019  (N = 77) | | 2020–2023  (N = 72) | | Subtotal | | (%) |
| SR | 101 | 1 | | 0 | | 1 | | 2 | | 2.0 |
| HR | 103 | 0 | | 2 | | 0 | | 2 | | 1.9 |
| Total | 204 | 1 (1.8%) | | 2 (2.6%) | | 1 (1.4%) | | **4** | | **2.0** |
| **Treatment intensification d/t high MRD** | | | | | | | | | | |
|  | No. of Total | ~2015 (N = 55) | | 2016–2019  (N = 77) | | 2020–2023  (N = 72) | | Subtotal | | (%) |
| SR | 101 | 1 | | 14 | | 7 | | 22  (RER 19, SER 3) | | 21.8 |
| HR | 103 | 4 | | 8 | | 3 | | 15  (RER 15) | | 14.6 |
| Total | 204 | 5 (9.1%) | | 22 (28.6%) | | 10 (13.9%) | | **37** | | **18.3** |
| **Proportion of treatment intensified patients among patients with high MRD** | | | | | | | | | | |
|  | No. of Total | ~2015 (N = 29) | | 2016–2019  (N = 43) | | 2020–2023  (N = 29) | | Subtotal | | (%) |
| SR | 52 | 1 | | 14 | | 7 | | 22  (RER 19, SER 3) | | 42.3 |
| HR | 49 | 4 | | 8 | | 3 | | 15  (RER 15) | | 30.6 |
| Total | **101** | 5 (17.2%) | | 22 (51.2%) | | 10 (34.5%) | | **37** | | **36.6** |

Abbreviations: EOI, end of induction; EOC, end of consolidation; MRD, minimal residual disease; SR, standard risk; HR, high risk; RER, rapid early responder; SER, slow early responder

**Supplementary Fig. 1** Five-year event-free survival rates using flow cytometric MRD grades

1. Event-free survival by the end of induction (EOI) MRD


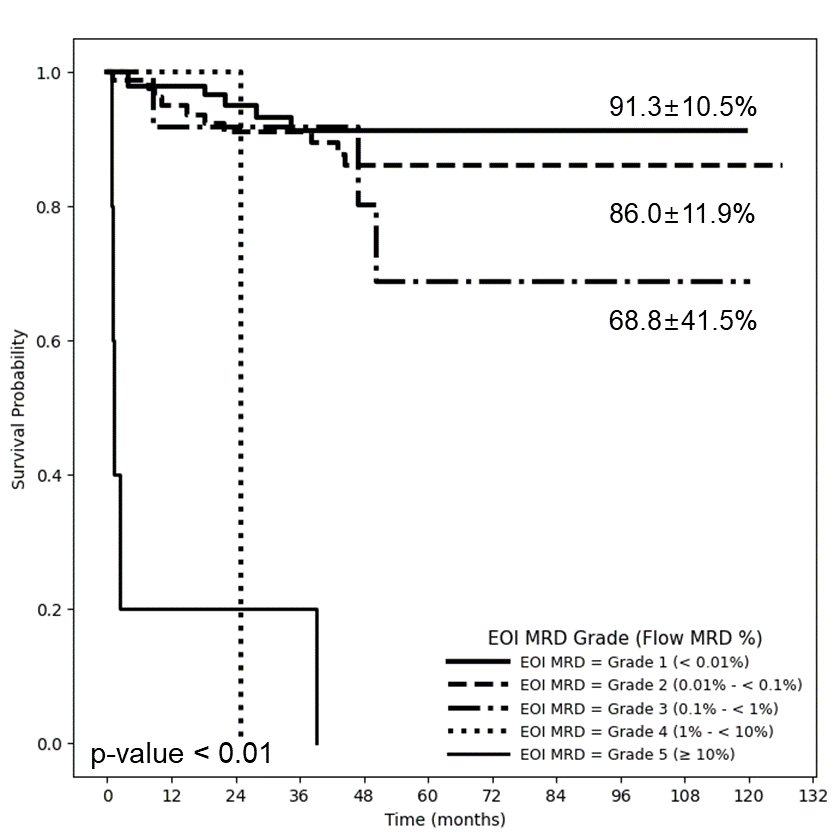


1. Event-free survival by end of consolidation (EOC) MRD


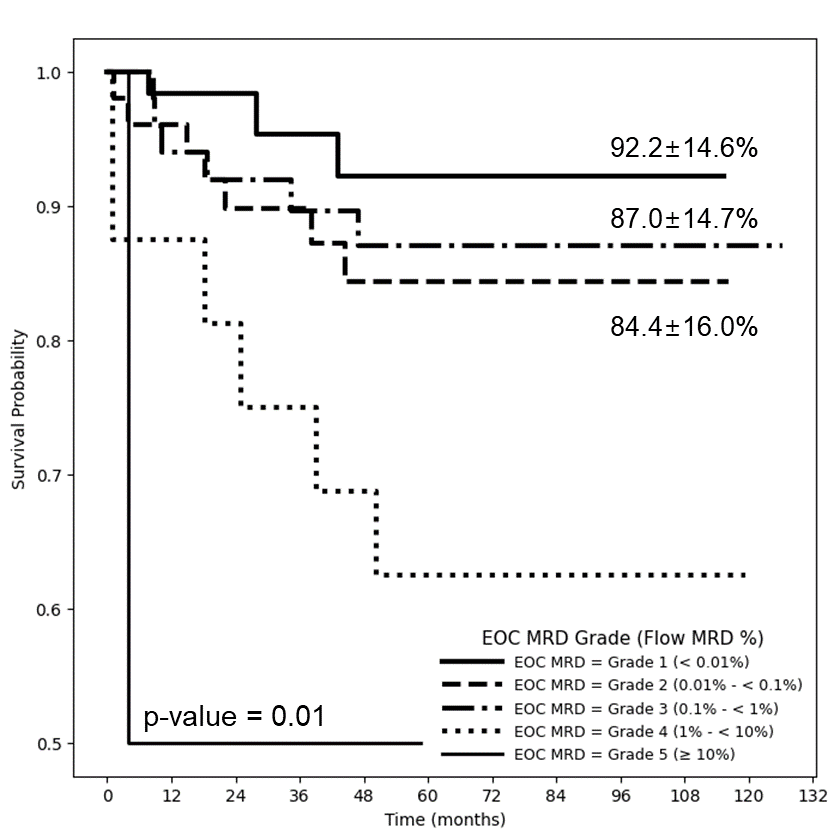


**Supplementary Fig. 2** Five-year survival rates by the years of diagnosis in all patients

a. Overall survival


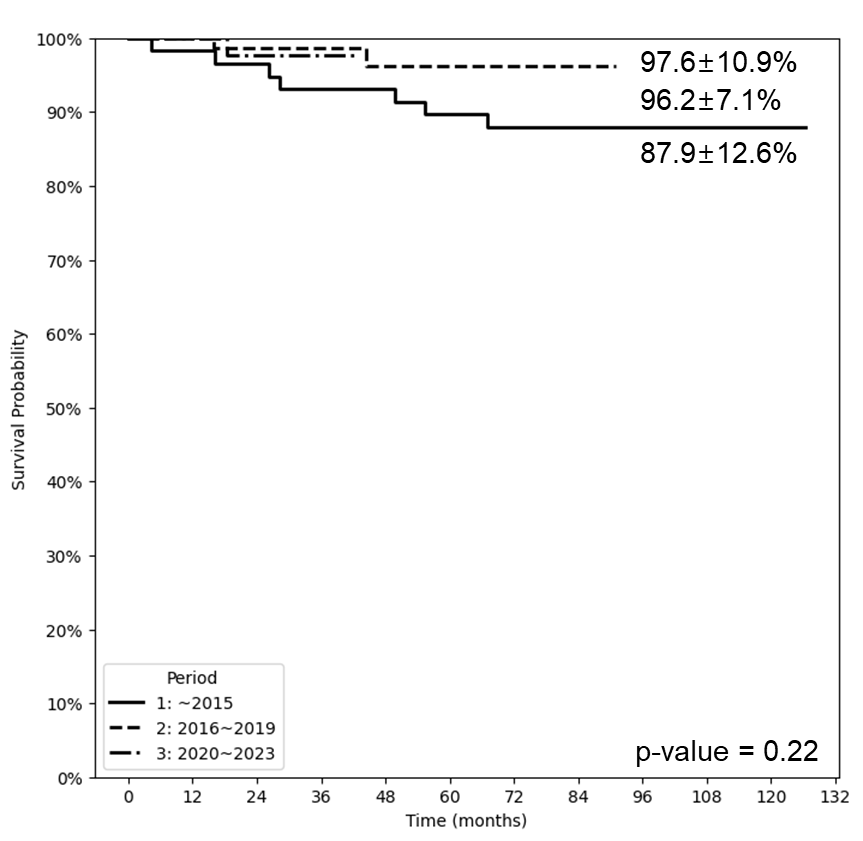


b. Event-free survival


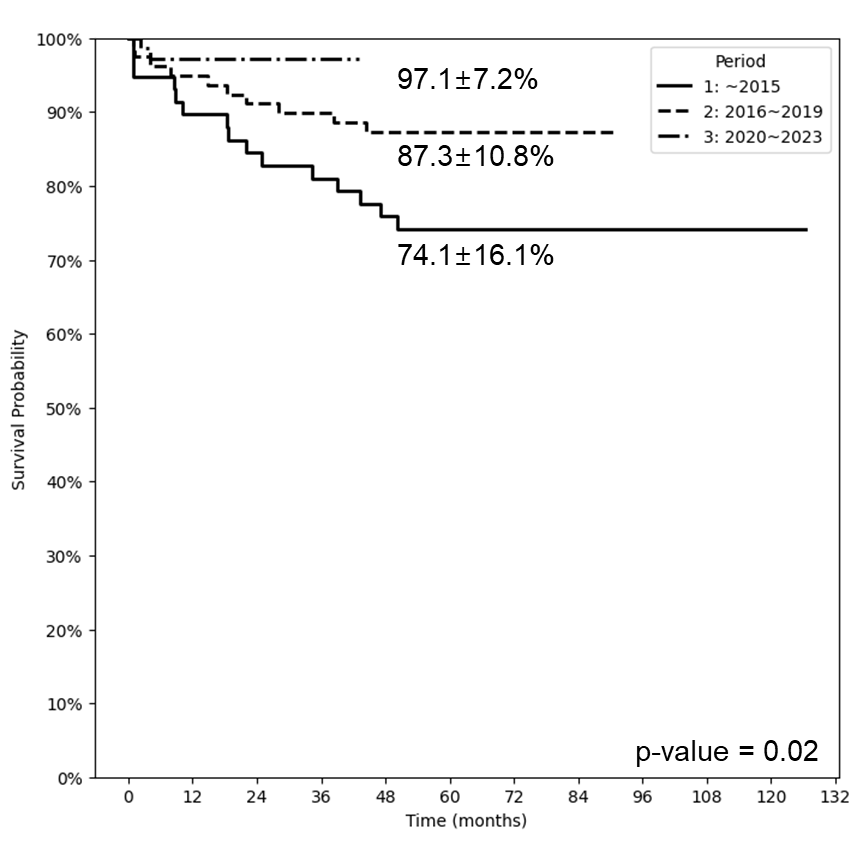

Supplement: Supplementary file 1 [file e39db060a55c7f705b7d7784.docx]
